# Supplementary material for: Clinical and Sociodemographic Profile of Psychomotor Agitation in Mental Health Hospitalisation: A Multicentre Study
Source: MDPI journal article supplement (doi:10.3390/ijerph192315972), 2022-11-30
Supplement: s1 [file s1]

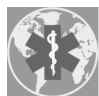

*Supplementary Materia*

**Table S1.** Items of the Spanish version of the Corrigan's ABS scale.

| Item                                                                     | Mean | SD± | Asymmetry | Kurtosis |
|--------------------------------------------------------------------------|------|-----|-----------|----------|
| 1. Poor attention paid, easily distracted, inability to concentrate      | 2.8  | 0.8 | −0.3      | −0.3     |
| 2. Impulsiveness, impatience, poor tolerance for pain and frustration    | 3.2  | 0.8 | −1        | 0.4      |
| 3. Little cooperation, does not allow care to be administered, demanding | 3.1  | 0.8 | −0.6      | −0.2     |
| 4. Is violent, threatens people                                          | 2.9  | 1   | −0.5      | −0.8     |
| 5. Explosive or unpredictable outbursts of anger                         | 2.9  | 0.9 | −0.6      | −0.6     |
| 6. Rocks, rubs, groans, or exhibits other self-stimulating behaviour     | 2.2  | 1.1 | 0.3       | −1.2     |
| 7. Pulls objects or ties from the bed                                    | 1.7  | 1   | 1         | −0.4     |
| 8. Roams around treatment áreas                                          | 2.5  | 1.1 | −0.1      | −1.3     |
| 9. Restlessness which comes and goes, excessive moving                   | 2.8  | 0.9 | −0.5      | −0.5     |
| 10. Repetitive motor or verbal behaviours                                | 2.7  | 0.9 | −0.3      | −0.8     |
| 11. Speaks fast, loudly, or excessively                                  | 2.9  | 1   | −0.5      | −0.9     |
| 12. Sudden mood changes                                                  | 2.8  | 1   | −0.6      | −0.7     |
| 13. Cries or laughs easily and excessively                               | 2    | 1   | 0.6       | −0.8     |
| 14. Is harmful or insulting                                              | 2.7  | 1   | −0.3      | −1.1     |
